# Supplementary material
Source: PubMed Central journal article supplement (PMC8262073)
Supplement: NIHMS1712651-supplement-1.pdf [file NIHMS1712651-supplement-1.pdf]

**Supplementary Table 1.** Characteristics of genetic variants associated with amounts of alcohol consumed in the UK Biobank.

| Chromosome | Rs number   | Gene                         | EA | NA | Beta value   | SE          |
|------------|-------------|------------------------------|----|----|--------------|-------------|
| 4          | rs10004020  | Intergenic                   | A  | G  | 0.009052333  | 0.001623231 |
| 4          | rs10028756  | Intergenic                   | A  | G  | -0.018574761 | 0.002171039 |
| 2          | rs1004787   | Intron:LINC01833             | A  | G  | 0.008442835  | 0.001465275 |
| 7          | rs10085696  | Intron:AUTS2                 | G  | A  | -0.011408902 | 0.001873083 |
| 7          | rs10236149  | Intron:ARPC1B                | G  | A  | -0.013498145 | 0.002219081 |
| 17         | rs10438820  | Intron:RPTOR                 | T  | C  | 0.008971778  | 0.001593488 |
| 12         | rs10506274  | Intron:ACSS3                 | T  | G  | -0.009037403 | 0.001458405 |
| 11         | rs10750025  | Intergenic                   | T  | C  | 0.010321447  | 0.001570358 |
| 1          | rs10753661  | Intergenic                   | A  | G  | -0.008638128 | 0.001569272 |
| 12         | rs10876188  | Intron:SLC4A8                | T  | C  | -0.007986853 | 0.001463078 |
| 9          | rs10978550  | Intergenic                   | C  | T  | -0.011748331 | 0.001802112 |
| 11         | rs11030084  | Intron:BDNF-<br>AS LINC00678 | T  | C  | -0.010606819 | 0.001880926 |
| 16         | rs1104608   | Intergenic                   | C  | G  | -0.010974988 | 0.001475848 |
| 14         | rs1123285   | Intron:OTX2                  | G  | C  | -0.008897365 | 0.00154416  |
| 16         | rs113443718 | Intron:SEZ6L2                | A  | G  | -0.010208258 | 0.001584629 |
| 4          | rs1154414   | Intron:ADH5                  | C  | T  | 0.017630373  | 0.002093815 |
| 14         | rs11625650  | Intron:KIF26A                | A  | G  | -0.009568091 | 0.00172405  |
| 2          | rs11692435  | Nonsynonymous:ACTR1B         | A  | G  | 0.017449894  | 0.00261585  |
| 5          | rs11739827  | Intron:TENM2                 | T  | G  | -0.008375229 | 0.001469112 |
| 4          | rs11940694  | Intron:KLB                   | G  | A  | 0.025949908  | 0.001485887 |
| 1          | rs12088813  | Intron:PDE4B                 | C  | A  | -0.009329047 | 0.001649158 |

|    |            |                       |   |   |              |             |
|----|------------|-----------------------|---|---|--------------|-------------|
| 8  | rs1217091  | Intergenic            | C | T | 0.012160827  | 0.001865386 |
| 4  | rs12499107 | Intergenic            | G | A | 0.012661209  | 0.002158718 |
| 2  | rs1260326  | Nonsynonymous:GCKR    | C | T | 0.020889835  | 0.001488339 |
| 4  | rs12651313 | Intergenic            | G | C | -0.008642927 | 0.001467223 |
| 5  | rs12655091 | Intergenic            | A | G | -0.008312109 | 0.001460289 |
| 11 | rs12795042 | Intron:LOC646522      | C | A | -0.008319009 | 0.001503872 |
| 15 | rs12907323 | Intron:AGBL1          | G | A | 0.008496596  | 0.001481314 |
| 2  | rs13024996 | Intron:ARHGAP15       | A | C | -0.010912645 | 0.001514769 |
| 2  | rs13032049 | Intron:WDPCP          | G | A | 0.01019455   | 0.001617979 |
| 3  | rs13066454 | Intergenic            | T | C | -0.008775946 | 0.001491956 |
| 3  | rs13094887 | Intergenic            | T | A | -0.010309671 | 0.001588926 |
| 4  | rs13107325 | Nonsynonymous:SLC39A8 | T | C | -0.027504515 | 0.002815982 |
| 8  | rs13250583 | Intergenic            | T | C | -0.009717545 | 0.001780116 |
| 2  | rs13383034 | Intron:LINC01833      | T | C | 0.014926977  | 0.001551195 |
| 11 | rs1713676  | Intergenic            | G | A | -0.007991984 | 0.00145913  |
| 16 | rs17177078 | Intron:TNRC6A         | T | C | -0.02231549  | 0.003011759 |
| 10 | rs17665139 | Intergenic            | T | C | -0.011560138 | 0.002046764 |
| 3  | rs2011092  | Intron:ZBTB38         | C | T | -0.008900405 | 0.001540056 |
| 4  | rs2165670  | Intergenic            | A | G | 0.02308038   | 0.002364267 |
| 2  | rs2178197  | Intron:GPN1           | G | A | -0.008781445 | 0.001471773 |
| 14 | rs2180870  | Intron:ARID4A         | C | T | -0.012177537 | 0.002132803 |
| 15 | rs2472297  | Intergenic            | T | C | 0.010606047  | 0.001685411 |
| 16 | rs2764771  | Intergenic            | A | G | 0.009890596  | 0.001581736 |
| 19 | rs281379   | Intergenic            | A | G | 0.013722336  | 0.001457844 |
| 17 | rs2854334  | Intergenic            | G | A | 0.009220984  | 0.001497813 |

|    |            |                                           |   |   |              |             |
|----|------------|-------------------------------------------|---|---|--------------|-------------|
| 8  | rs28601761 | Intergenic                                | G | C | 0.009102878  | 0.001476682 |
| 1  | rs28680958 | Intron:ZBTB37                             | A | G | -0.010996457 | 0.001769942 |
| 7  | rs35034355 | Intron:ORC5                               | A | G | -0.008096817 | 0.001458945 |
| 4  | rs35538052 | Intron:KLB                                | A | G | -0.008524877 | 0.001502312 |
| 4  | rs36052336 | Intron:ADH1C                              | G | A | -0.018428809 | 0.00303378  |
| 4  | rs3748034  | Nonsynonymous:HGFAC                       | T | G | -0.011740341 | 0.002081935 |
| 16 | rs378421   | Intergenic                                | A | G | -0.011205474 | 0.001486812 |
| 17 | rs3803800  | Nonsynonymous:TNFSF12-<br>TNFSF13 TNFSF13 | G | A | 0.011378876  | 0.001777082 |
| 12 | rs3809162  | Intergenic                                | G | A | 0.009060925  | 0.001489607 |
| 18 | rs4092465  | Intergenic                                | G | A | -0.008291878 | 0.001513883 |
| 4  | rs4501255  | Intron:BEND4                              | G | C | 0.010693415  | 0.001718941 |
| 17 | rs4548913  | Intron:SRR                                | A | G | -0.008359953 | 0.001511274 |
| 4  | rs4690727  | Intron:INPP4B                             | G | C | 0.010816985  | 0.001619716 |
| 4  | rs4699791  | Intergenic                                | A | G | 0.018570721  | 0.002477197 |
| 20 | rs4815364  | Intron:ACSS1                              | A | G | 0.008582356  | 0.001498544 |
| 12 | rs4842786  | Intergenic                                | A | G | -0.008797801 | 0.001478674 |
| 5  | rs4916723  | Intron:LINC00461                          | C | A | -0.009952257 | 0.001478674 |
| 11 | rs4938230  | Intergenic                                | A | C | 0.012810377  | 0.001998209 |
| 13 | rs500321   | Intergenic                                | T | A | -0.009669361 | 0.001653426 |
| 1  | rs5024204  | Intron:PTGER3                             | T | A | 0.009702711  | 0.001628467 |
| 5  | rs55872084 | Intron:SGCD                               | T | G | 0.009978744  | 0.001718941 |
| 9  | rs55932213 | Intergenic                                | G | A | 0.009488271  | 0.001654204 |
| 11 | rs56030824 | Intron:SPI1                               | A | G | -0.011601888 | 0.001562978 |
| 2  | rs56337305 | Intergenic                                | C | T | -0.009588381 | 0.001499283 |

|    |            |                  |   |   |              |             |
|----|------------|------------------|---|---|--------------|-------------|
| 1  | rs58107686 | Intron:PHC2      | A | C | -0.009747126 | 0.00158537  |
| 3  | rs60654199 | Intron:RASA2     | A | C | -0.016660294 | 0.003001977 |
| 16 | rs62044525 | Intergenic       | G | C | -0.01217318  | 0.001882851 |
| 3  | rs62250685 | Intron:CADM2     | G | A | -0.014357061 | 0.001500092 |
| 7  | rs6460047  | Intergenic       | C | T | 0.011623538  | 0.00179569  |
| 3  | rs6787172  | Intron:RSRC1     | G | T | -0.008030894 | 0.001466234 |
| 11 | rs682011   | Intergenic       | C | T | 0.008212447  | 0.001467913 |
| 7  | rs6951574  | Intergenic       | C | T | 0.013222216  | 0.001462828 |
| 1  | rs705687   | Intergenic       | G | A | -0.010904017 | 0.001775889 |
| 10 | rs7074871  | Intergenic       | A | G | -0.00939985  | 0.001672158 |
| 16 | rs7185555  | Intergenic       | C | G | -0.011100514 | 0.002026667 |
| 2  | rs72859280 | Intergenic       | T | G | 0.022885324  | 0.003901915 |
| 2  | rs77165542 | Intergenic       | T | C | -0.026010899 | 0.003971245 |
| 11 | rs7950166  | Intron:TRIM66    | T | C | -0.009799202 | 0.001515663 |
| 16 | rs79616692 | Intron:LINC01572 | C | G | 0.016302272  | 0.002350583 |
| 1  | rs823114   | Intergenic       | A | G | 0.00876774   | 0.001467417 |
| 2  | rs828867   | Utr3:TET3        | A | G | 0.008757157  | 0.001463597 |
| 22 | rs9607814  | Intergenic       | A | C | -0.010181001 | 0.001858788 |
| 3  | rs9838144  | Intron:CPNE4     | C | G | -0.009964223 | 0.001792521 |
| 18 | rs9950000  | Intron:TCF4      | T | C | -0.009117697 | 0.001490903 |

**Supplementary Table 2.** The association between drinking habits score (DHS) and all-cause mortality and cause specific mortality in the original analysis and 10-fold cross-validation analysis.

|                            | Original analysis |                 | Cross-validation analysis |                 |
|----------------------------|-------------------|-----------------|---------------------------|-----------------|
|                            | HR (95% CI)       | <i>P</i> -trend | HR (95% CI)               | <i>P</i> -trend |
| <b>All-cause mortality</b> |                   |                 |                           |                 |
| Multivariable adjusted     | 0.90 (0.87-0.93)  | <.001           | 0.90 (0.87-0.93)          | <.001           |
| <b>CVD mortality</b>       |                   | <i>P</i> -trend |                           | <i>P</i> -trend |
| Multivariable adjusted     | 0.92 (0.85-0.99)  | 0.03            | 0.92 (0.85-0.99)          | 0.03            |
| <b>CA mortality</b>        |                   | <i>P</i> -trend |                           | <i>P</i> -trend |
| Multivariable adjusted     | 0.91 (0.87-0.95)  | <.001           | 0.91 (0.87-0.95)          | <.001           |
| <b>Other reason</b>        |                   | <i>P</i> -trend |                           | <i>P</i> -trend |
| Multivariable adjusted     | 0.88 (0.82-0.94)  | <.001           | 0.88 (0.82-0.94)          | <.001           |

Results adjusted for age, sex, race, assessment centres, BMI, physical activity, smoking (never, past, current), healthy diet, Townsend deprivation index, diabetes, hypertension, high cholesterol and levels of alcohol intake.

**Supplementary Figure 1.** Stratified analyses for association of drinking habits score (DHS)\* and risk of all-cause mortality and cause-specific mortality.

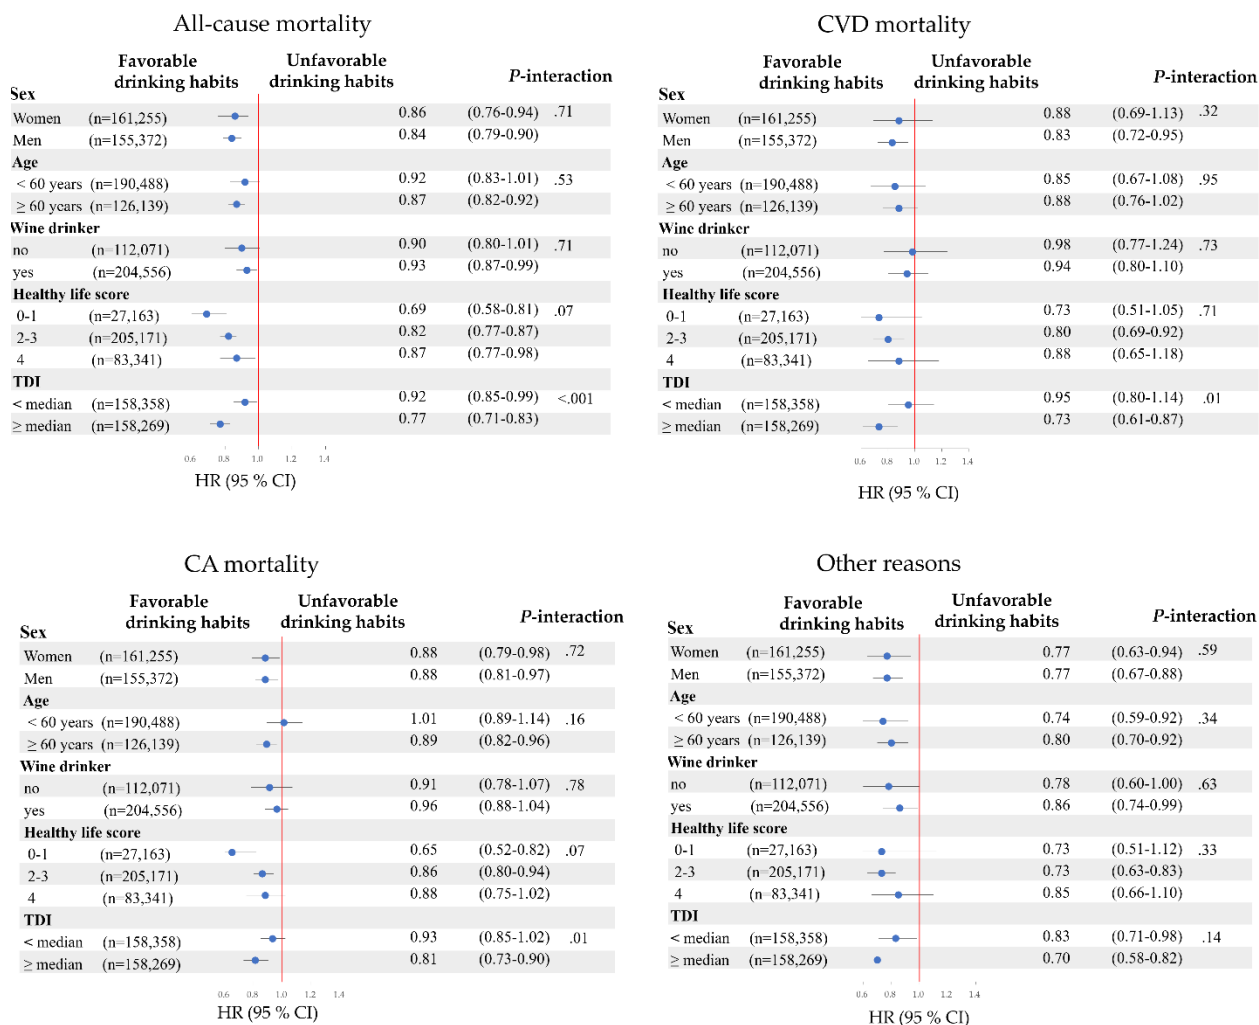

Results were adjusted by adjusted for age, sex, race, assessment centres, BMI, physical activity, smoking (never, past, current), healthy diet, Townsend deprivation index, diabetes, hypertension, high cholesterol and alcohol intake level.

For the stratified analyses by HLS, results were adjusted by adjusted for age, sex, race, Townsend deprivation index, diabetes, hypertension, high cholesterol and alcohol intake level.

\* Because the intermediate DHS (DHS=1) group had similar risk of mortality to the unhealthy DHS (DHS=0) group, we combined these two groups to maximize statistical power. Favorable drinking habits was defined as DHS=2 and unfavorable drinking habits was defined as DHS=0 or 1.

**Supplementary Figure 2.** The joint association of amount of alcohol intake and drinking habits score in relation to risks of all-cause mortality and cause-specific mortality in women.

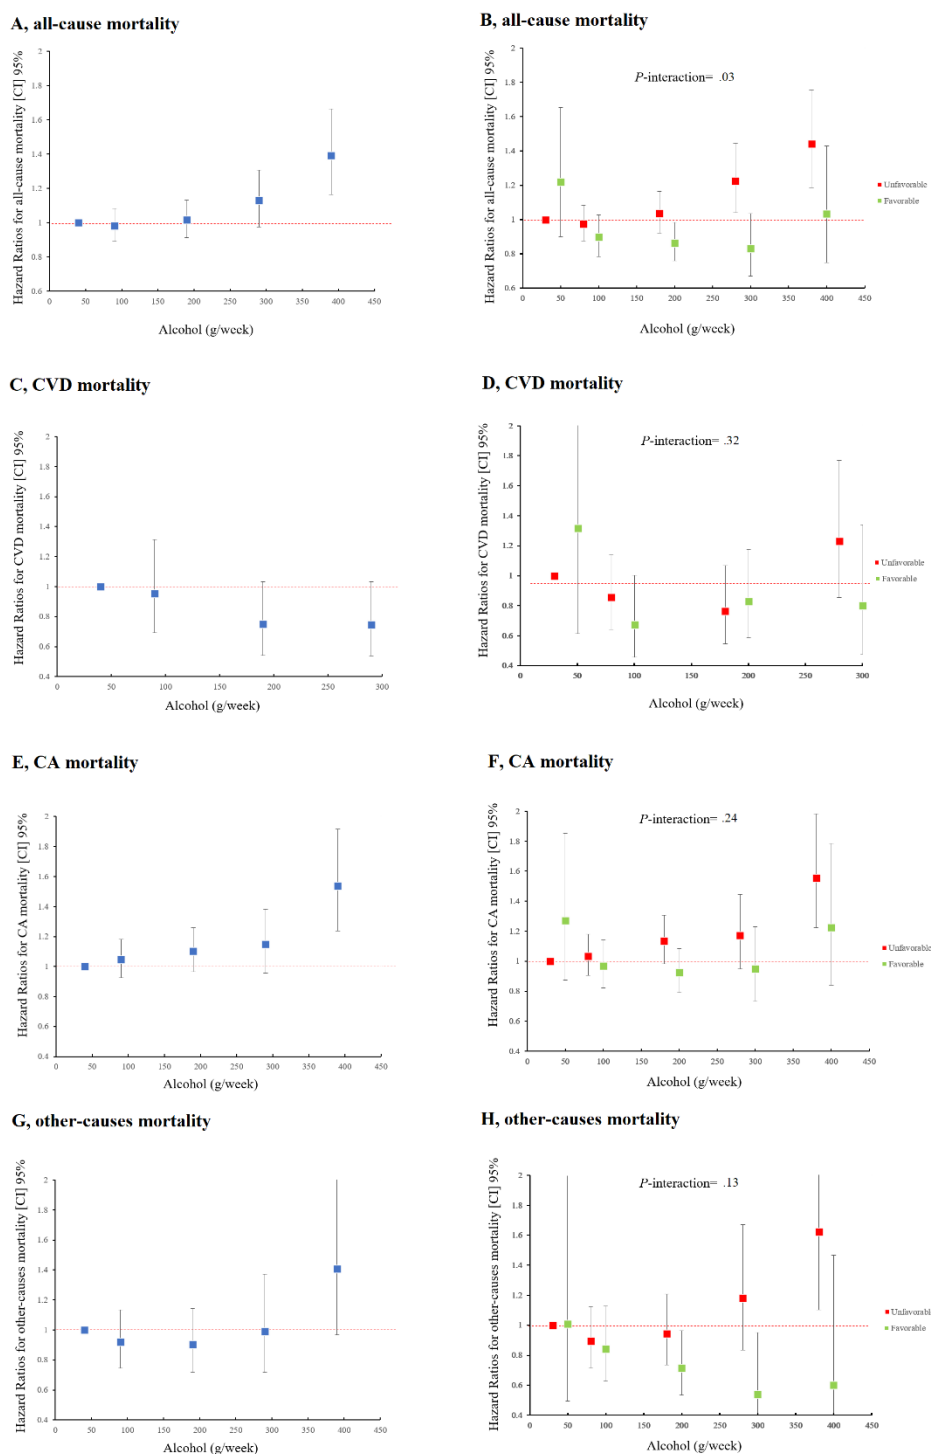

Results were adjusted age, race, assessment centres, BMI, physical activity, smoking (never, past, current), healthy diet, Townsend deprivation index, diabetes, hypertension, high cholesterol and DHS (for A, C, E and G). For CVD mortality, because the limited cases of CVD mortality in the high levels of amount of alcohol consumed, we combined two groups ( $\geq 200$ – $<300$  and  $\geq 300$ ) to maximize statistical power.

**Supplementary Figure 3.** The joint association of amount of alcohol intake and drinking habits score in relation to risks of all-cause mortality and cause-specific mortality in men.

**A, all-cause mortality**

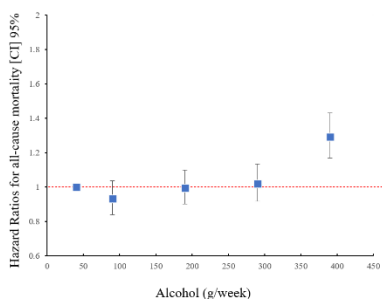

**B, all-cause mortality**

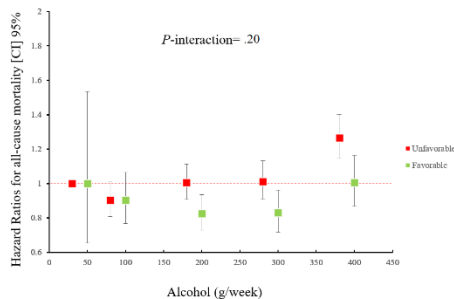

**C, CVD mortality**

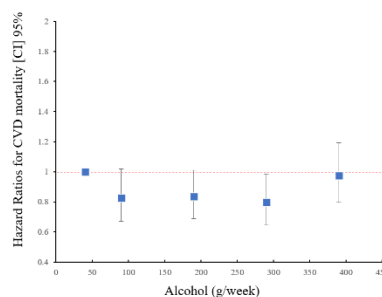

**D, CVD mortality**

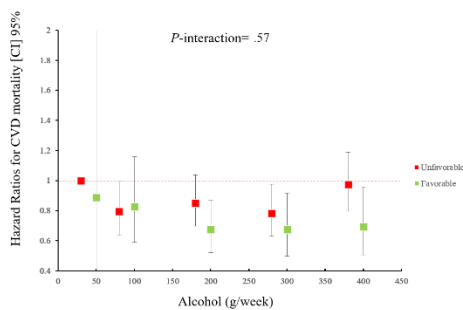

**E, CA mortality**

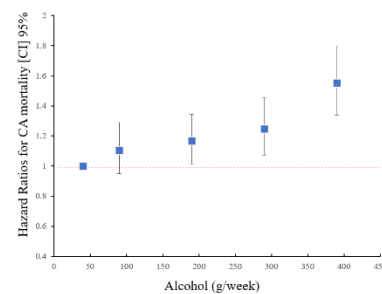

**F, CA mortality**

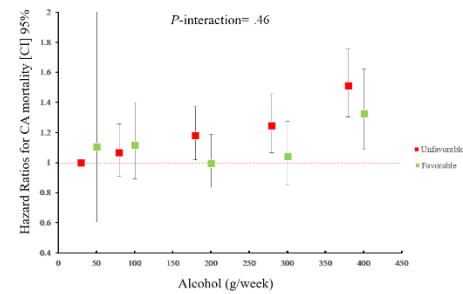

**G, other-causes mortality**

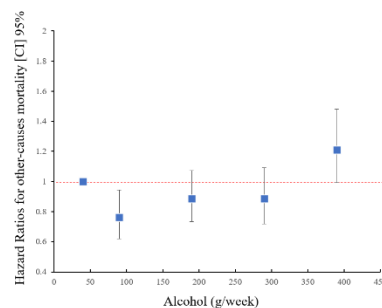

**H, other-causes mortality**

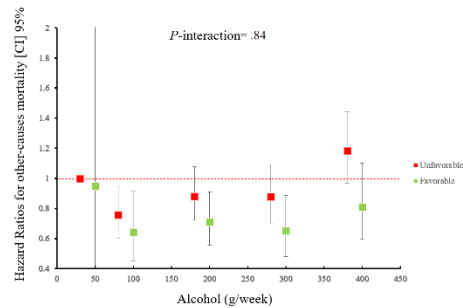

Results were adjusted age, race, assessment centres, BMI, physical activity, smoking (never, past, current), healthy diet, Townsend deprivation index, diabetes, hypertension, high cholesterol and DHS (for A, C, E and G).



**Supplementary Figure 4.** The joint association of amount of alcohol intake and drinking habits score in relation to risks of all-cause mortality and cause-specific mortality in men (including never drinkers and past drinkers).

**A, All-cause mortality**

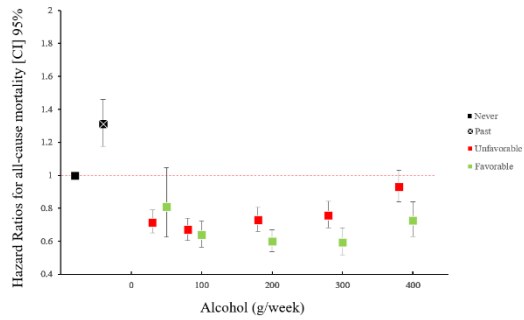

**B, CVD mortality**

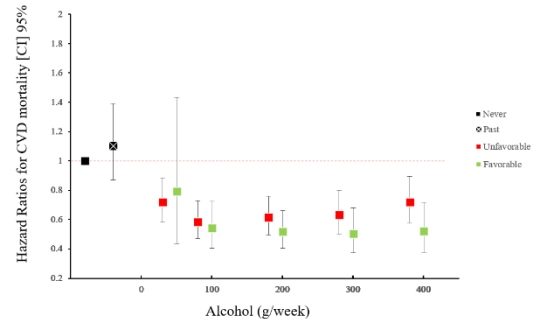

**C, CA mortality**

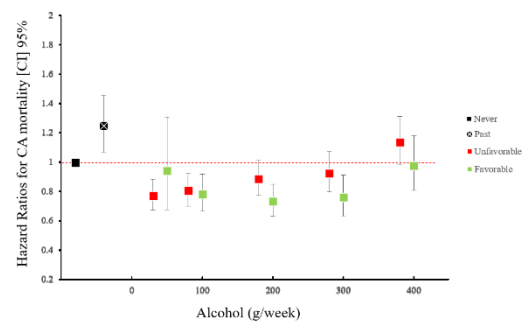

**D, Other-causes mortality**

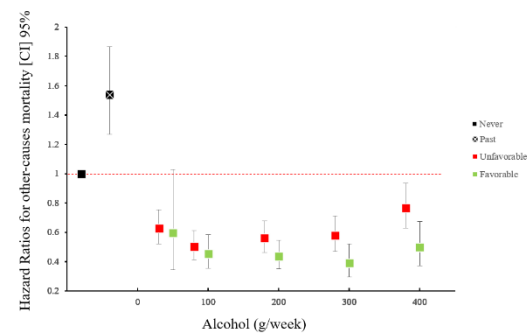

Results were adjusted age, sex, race, assessment centres, BMI, physical activity, smoking (never, past, current), healthy diet, Townsend deprivation index, diabetes, hypertension and high cholesterol.

**Supplementary Figure 5.** The joint association of ALC-GRS and drinking habits score in relation to risk of all-cause mortality and cause-specific mortality.

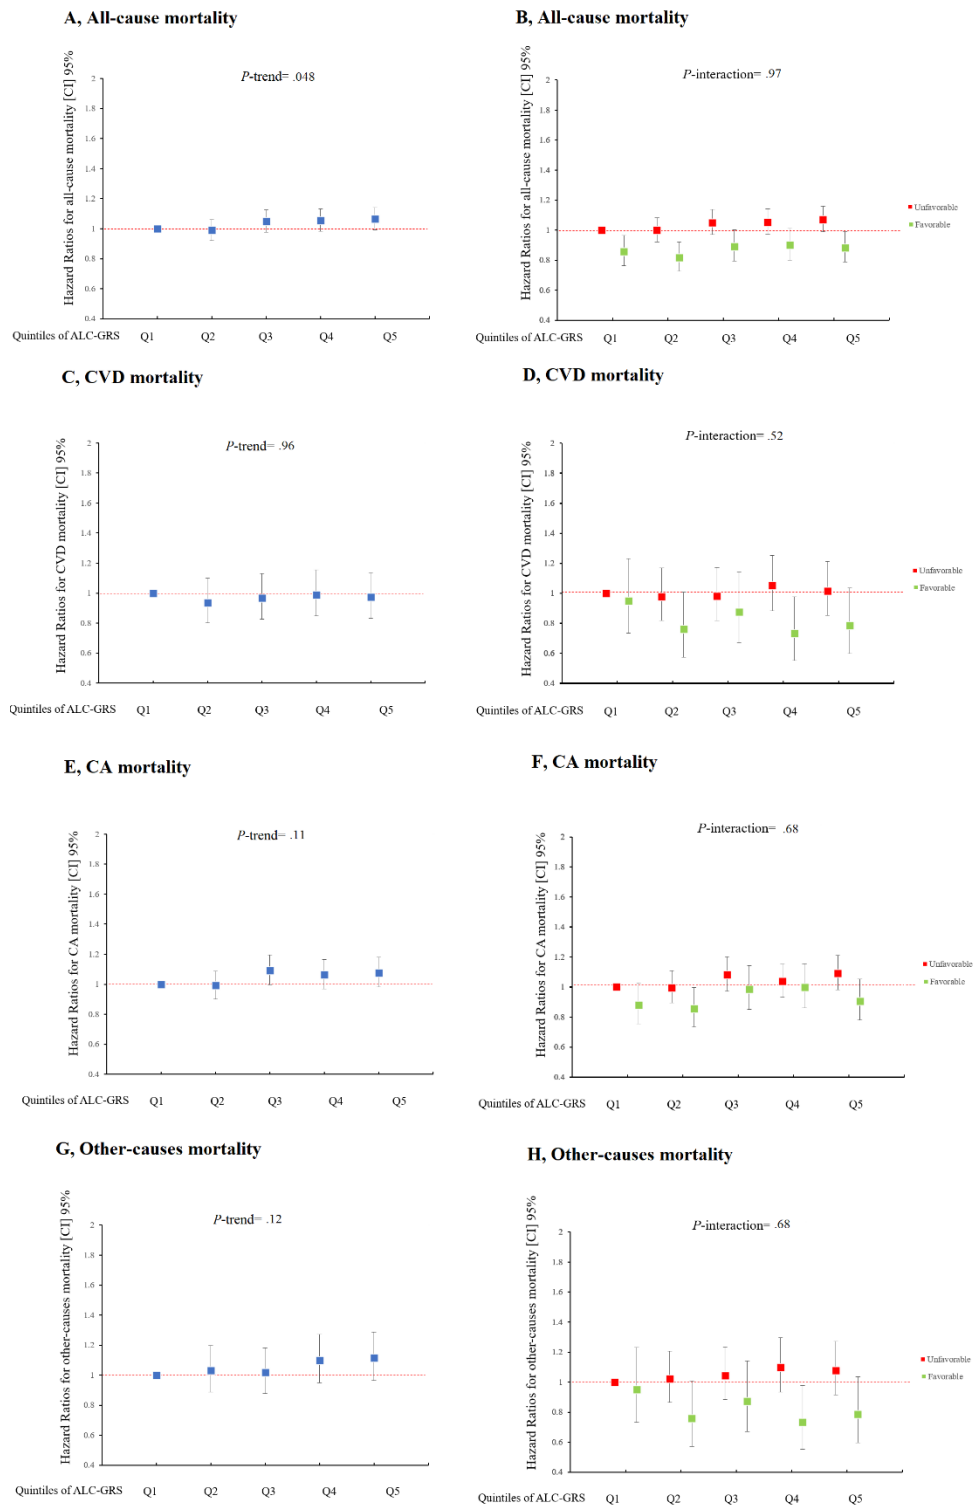

Results were adjusted age, sex, assessment centres, BMI, physical activity, smoking (never, past, current), healthy diet, Townsend deprivation index, diabetes, hypertension, high cholesterol, DHS (for A, C, E and H), the first 10 genetic principal components, genotyping array and the third-degree relatedness.

## Supplemental Materials

### Genotyping and calculation of genetic risk score

Detailed information about genotyping and imputation in the UK Biobank study has have been described previously<sup>1</sup>. A weighted method was used to calculate the alcohol intake-GRS<sup>2</sup>. Each SNP was recoded as 0, 1, or 2 according to the number of risk alleles, and each SNP was weighted by its relative effect size ( $\beta$  coefficient) on alcohol consumption obtained from the previous genome-wide association study<sup>3</sup>. The ALC-GRS was calculated by the following equation:  $GRS=(\beta_1 \times SNP_1 + \beta_2 \times SNP_2 + \dots + \beta_{90} \times SNP_{90}) \times (90 / \text{sum of the } \beta \text{ coefficients})$ , where  $SNP_i$  is the risk allele number of each SNP.

### Details of covariates

The baseline touch-screen questionnaire was used to assesses potential confounders, including age, sex, ethnicity, assessment centres, Townsend deprivation index, smoking status and dietary intakes (red meat, vegetables, fruits and fish). Healthy diet score was evaluated by red meat < median, vegetable intake  $\geq$  median, fruit intake  $\geq$  median, fish intake  $\geq$  median; One point was given for each favorable diet factor and the total diet score ranges from 0 to 4<sup>4,5</sup>; a healthy diet was defined as a healthy diet score  $\geq$  2. Height was measured by a Seca 202 height measure. Weight was measured to the nearest 0.1 kg by the Tanita BC-418 MA body composition analyzer. Body mass index (BMI) (calculated as weight (kg) divided by height in meters squared ( $m^2$ )). Total physical activity was computed as the sum of walking and moderate and vigorous activity, measured as metabolic equivalent (MET, minutes/week) according to the IPAQ scoring protocol<sup>6</sup>. Hypertension was defined as a self-reported history of hypertension or a systolic blood pressure  $\geq$  140 mmHg or a diastolic blood pressure  $\geq$  90 mm Hg or self-reported or taking antihypertensive medications. High cholesterol was defined as a self-reported history of high cholesterol or taking cholesterol lowering medication. Diabetes was evaluated by UK biobank algorithm for the diagnosis of diabetes<sup>7</sup>.

We also calculated a healthy lifestyle score based on BMI (<30 kg/ $m^2$ ), smoking (never smoking), healthy diet and physical activity ( $\geq$  600 MET minutes/week). One point was given for each favorable lifestyle factor (range, 0–4)<sup>8</sup>.

## References

1. Bycroft C, Freeman C, Petkova D, et al. Genome-wide genetic data on~ 500,000 UK Biobank participants. *BioRxiv*. 2017:166298.
2. Ripatti S, Tikkanen E, Orho-Melander M, et al. A multilocus genetic risk score for coronary heart disease: case-control and prospective cohort analyses. *The Lancet*. 2010;376(9750):1393.
3. Liu M, Jiang Y, Wedow R, et al. Association studies of up to 1.2 million individuals yield new insights into the genetic etiology of tobacco and alcohol use. *Nat Genet*. 2019;51(2):237.
4. Lloyd-Jones DM, Hong Y, Labarthe D, et al. Defining and setting national goals for cardiovascular health promotion and disease reduction. The American Heart Association's strategic impact goal through 2020 and beyond. *Circulation*. 2010:-.
5. Pazoki R, Dehghan A, Evangelou E, et al. Genetic predisposition to high blood pressure and lifestyle factors: associations with midlife blood pressure levels and cardiovascular events. *Circulation*. 2018;137(7):653-661.
6. Committee IR. Guidelines for data processing and analysis of the International Physical Activity Questionnaire (IPAQ)-short and long forms. <http://www.ipaq.ki.se/scoring.pdf>. 2005:-.
7. Eastwood SV, Mathur R, Atkinson M, et al. Algorithms for the capture and adjudication of prevalent and incident diabetes in UK Biobank. *PLoS One*. 2016;11(9):e0162388.
8. Lloyd-Jones DM. American Heart Association Strategic Planning Task Force and Statistics Committee. Defining and setting national goals for cardiovascular health promotion and disease reduction: the American Heart Association's Strategic Impact Goal through 2020 and beyond. *Circulation*. 2010;121:586.
